# Supplementary material for: Oblique rifting triggered by slab tearing: the case of the Alboran rifted margin in the eastern Betics
Source: Copernicus journal article supplement (doi:10.5194/se-14-1221-2023), 2023-12-07
Supplement: Supplementary file 1 [file se-14-1221-2023-supplement.pdf]

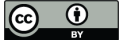

*Supplement of*

## **Oblique rifting triggered by slab tearing: the case of the Alboran rifted margin in the eastern Betics**

**Marine Larrey et al.**

*Correspondence to:* Frédéric Mouthereau ([frederic.mouthereau@get.omp.eu](mailto:frederic.mouthereau@get.omp.eu))

The copyright of individual parts of the supplement might differ from the article licence.

## Supplementary materials

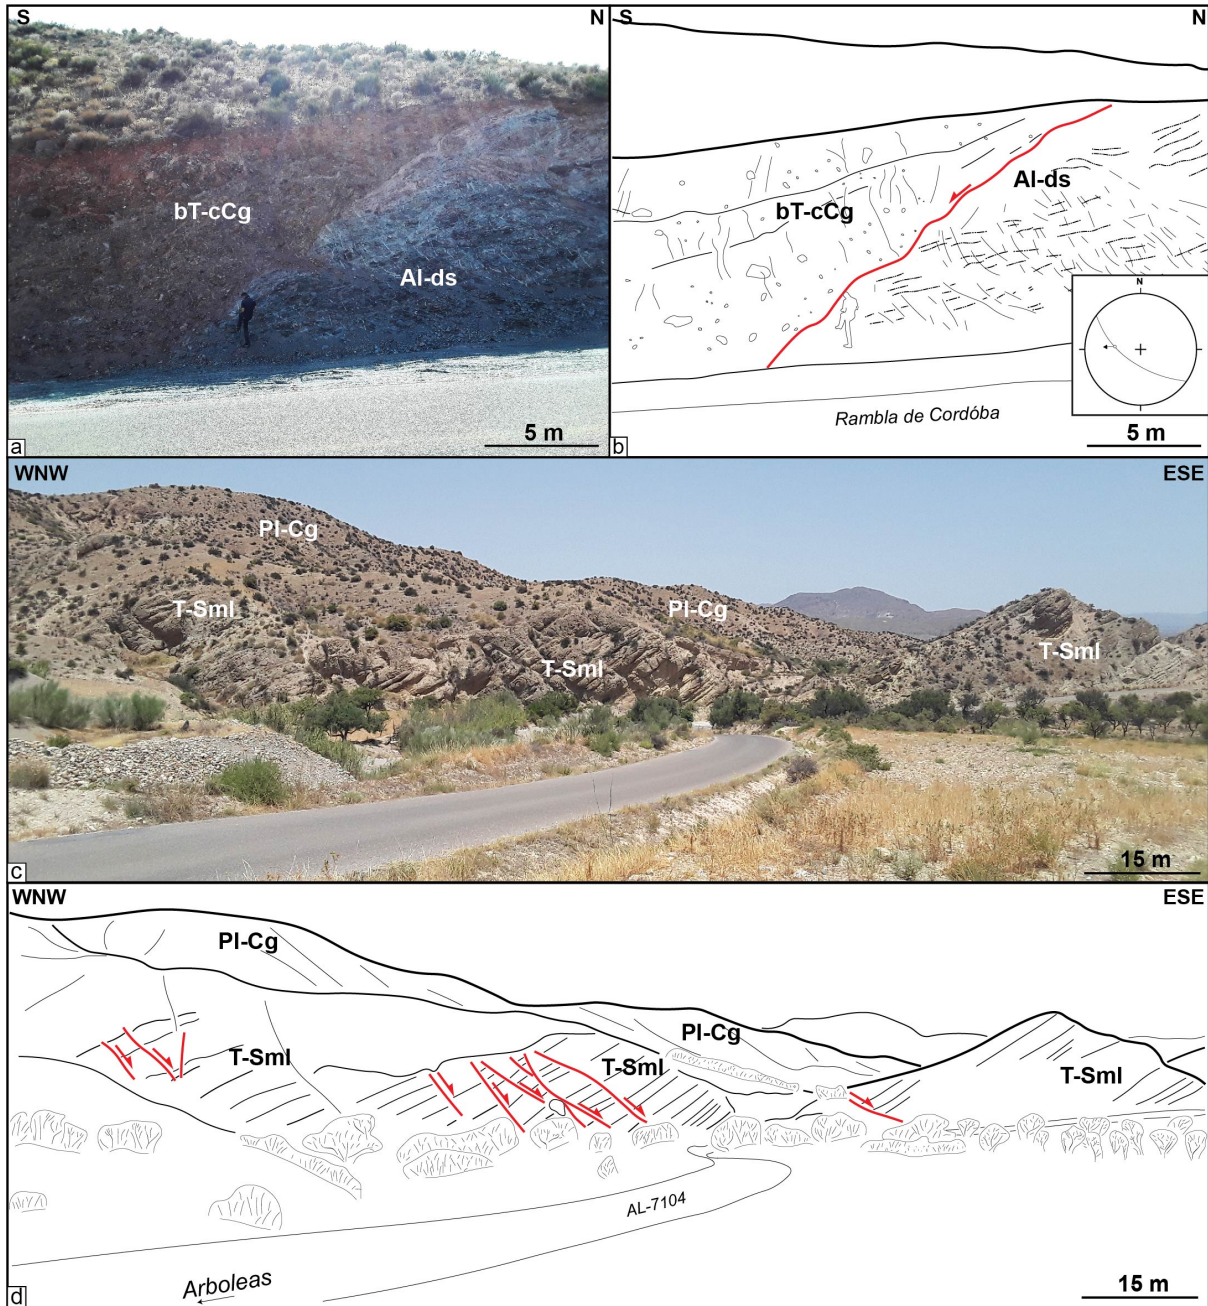

**Figure S1** : (a, b) Contact between the lower Tortonian red conglomerates and the Alpujarride units in the southern part of the HOB (Rambla de Cordoba, 2km NW Arboleas, see Figure 5 for location) that is reactivated as a normal fault with a dextral shear component consistent with the NE-SW extension described regionally. (c, d) NW-SE faults cutting through the late Tortonian sand and marls series south of HOB (1 km south of Arboleas). Al-ds: Alpujarride dark shists; bT-cCg: basal Tortonian continental Conglomerates; T-Sml: Tortonian Sandstones-marls; PI-Cg: Pliocene Conglomerates. Coordinates



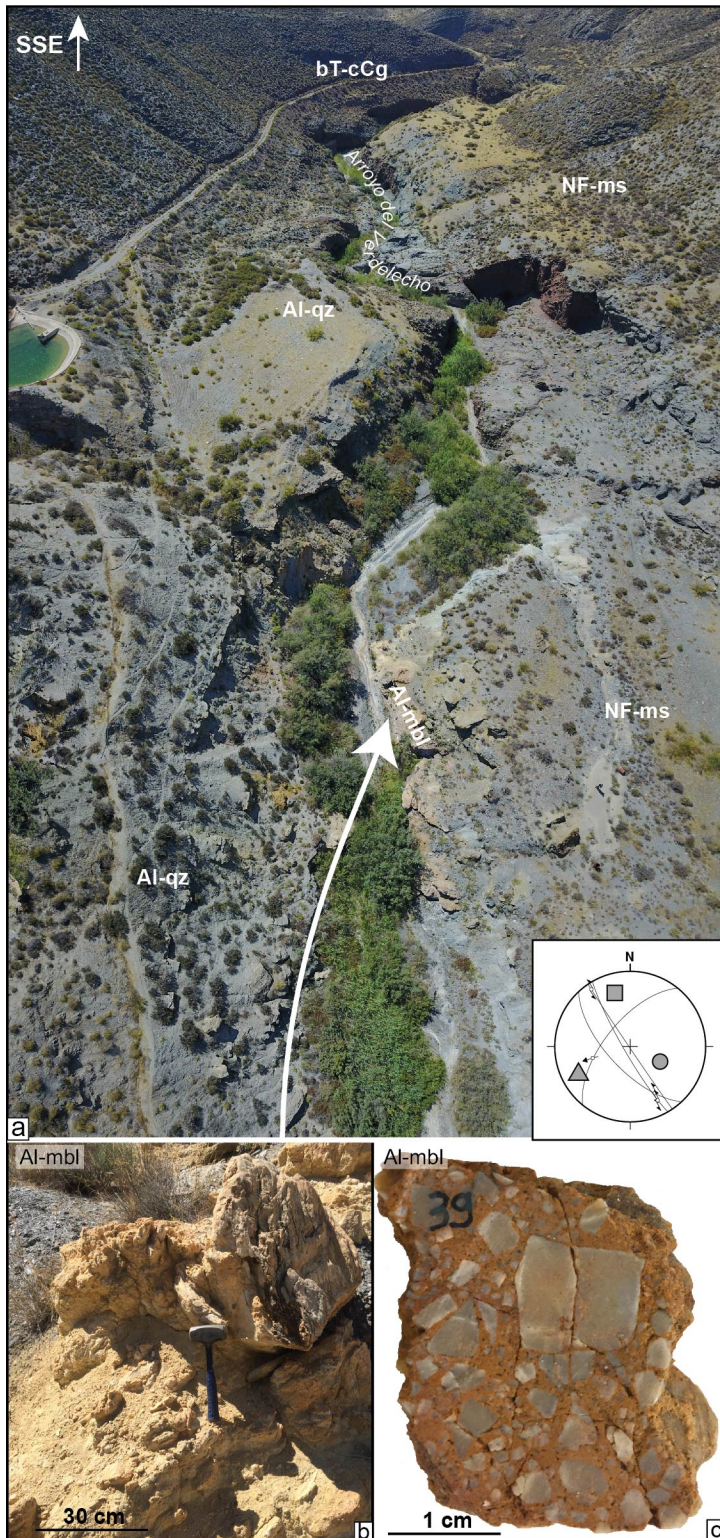

**Figure S2:** (a) Drone view of the NW-SE valley (Arroyo de Verdelecho, same area as Figure 11) in the eastern border of the Alhabia basin showing the tectonic contact between quartzites of the Alpujarride complex (Al-qz) and micaschists of the Nevado-Filabrides complex (NF-ms). (b, c). The NW-SE major fault, parallel to the NW-SE valley is outlined by cataclastic breccias made of Alpujarride complex marbles. It consists of the juxtaposition of left-lateral and normal fault slips with an unclear chronological succession. Al-mbl: Alpujarride marbles.

| Location           | Stratigraphic age       | References               | $\sigma_1$ |        | $\sigma_2$ |        | $\sigma_3$ |        | Extension and compression axes |         |
|--------------------|-------------------------|--------------------------|------------|--------|------------|--------|------------|--------|--------------------------------|---------|
|                    |                         |                          | Strike     | Plung. | Strike     | Plung. | Strike     | Plung. |                                |         |
|                    | L. Tortonian            |                          | 263        | 86     | 101        | 4      | 11         | 1      | E                              | NNE-SSW |
|                    | Lower Tortonian         |                          | 133        | 82     | 292        | 7      | 23         | 3      | E                              | NNE-SSW |
|                    | Serr.- L.Tortonian      |                          | 322        | 80     | 61         | 2      | 152        | 10     | E                              | NW-SE   |
|                    | Serr.- L.Tortonian      |                          | 86         | 86     | 290        | 4      | 200        | 2      | E                              | NNE-SSW |
|                    | Serr.- L.Tortonian      |                          | 104        | 87     | 287        | 3      | 204        | 2      | E                              | NNE-SSW |
|                    | Serr.- L.Tortonian      |                          | 341        | 1      | 252        | 39     | 69         | 54     | C                              | NNW-SSE |
|                    | Lower Messinian         |                          | 348        | 2      | 82         | 61     | 256        | 29     | C                              | NNW-SSE |
|                    | Lower Messinian         |                          | 265        | 84     | 110        | 5      | 19         | 2      | E                              | NNE-SSW |
|                    | Serr.- L.Tortonian      |                          | 32         | 84     | 243        | 5      | 153        | 3      | E                              | NNW-SSE |
|                    | Serr.- L.Tortonian      |                          | 2          | 83     | 240        | 3      | 150        | 6      | E                              | NNW-SSE |
|                    | Serr.- L.Tortonian      |                          | 347        | 4      | 77         | 5      | 221        | 84     | C                              | NNE-SSW |
|                    | Lower Tortonian         |                          | 22         | 77     | 280        | 3      | 189        | 13     | E                              | NNE-SSW |
|                    | Lower Tortonian         |                          | 278        | 87     | 104        | 3      | 14         | 0      | E                              | NNE-SSW |
|                    | L.Tort.-<br>L.Messinian |                          | 355        | 89     | 264        | 0      | 174        | 1      | E                              | N-S     |
| Huerca-Overa basin | L.Tort.-<br>L.Messinian | Augier et al.<br>(2005c) | 15         | 7      | 281        | 27     | 117        | 62     | C                              | NNE-SSW |
|                    | L.Tort.-<br>L.Messinian |                          | 324        | 87     | 110        | 2      | 200        | 2      | E                              | NNE-SSW |
|                    | Serr.- L.Tortonian      |                          | 1          | 16     | 243        | 59     | 99         | 26     | C                              | N-S     |
|                    | Lower Messinian         |                          | 177        | 4      | 70         | 76     | 268        | 14     | C                              | N-S     |
|                    | Permo-Trias             |                          | 144        | 82     | 282        | 8      | 12         | 6      | E                              | N-S     |
|                    | Serr.- L.Tort.          |                          | 343        | 82     | 97         | 3      | 187        | 7      | E                              | N-S     |
|                    | Lower Tort.             |                          | 267        | 88     | 98         | 2      | 8          | 0      | E                              | N-S     |
|                    | Serr.- L.Tortonian      |                          | 239        | 82     | 62         | 9      | 153        | 4      | E                              | NW-SE   |
|                    | L.Tort.-<br>L.Messinian |                          | 99         | 87     | 265        | 3      | 355        | 1      | E                              | N-S     |
|                    | Serr.- L.Tort.          |                          | 174        | 87     | 41         | 2      | 311        | 2      | E                              | NW-SE   |
|                    | Serr.- L.Tortonian      |                          | 74         | 80     | 271        | 9      | 181        | 3      | E                              | N-S     |
|                    | Serr.- L.Tortonian      |                          | 146        | 76     | 40         | 4      | 309        | 13     | E                              | NW-SE   |
|                    | Lower Tortonian         |                          | 119        | 79     | 276        | 10     | 6          | 4      | E                              | N-S     |
|                    | Lower Tortonian         |                          | 52         | 78     | 276        | 9      | 184        | 8      | E                              | N-S     |

|                     |                         |                          |     |    |     |    |     |    |   |             |
|---------------------|-------------------------|--------------------------|-----|----|-----|----|-----|----|---|-------------|
|                     | L.Tort.-<br>L.Messinian |                          | 344 | 13 | 83  | 36 | 237 | 51 | C | NNW-SSE     |
|                     | Lower Tortonian         |                          | 324 | 85 | 119 | 5  | 209 | 2  | E | NNE-SSW     |
|                     | Lower Tortonian         |                          | 325 | 79 | 96  | 7  | 187 | 8  | E | N-S         |
|                     | Permo-Trias             |                          | 214 | 86 | 99  | 2  | 8   | 4  | E | N-S         |
|                     | Permo-Trias             |                          | 126 | 72 | 239 | 7  | 321 | 16 | E | NNW-SSE     |
|                     | Permo-Trias             |                          | 8   | 80 | 103 | 1  | 194 | 10 | E | N-S         |
|                     | Lower Tortonian         |                          | 348 | 81 | 101 | 4  | 192 | 8  | E | N-S         |
|                     | L.Tort.-<br>L.Messinian |                          | 129 | 80 | 266 | 7  | 357 | 7  | E | N-S         |
|                     | Serr.- L.Tortonian      |                          | 9   | 9  | 100 | 4  | 214 | 80 | C | NNE-SSW     |
|                     | Serr.- L.Tortonian      |                          | 156 | 82 | 253 | 1  | 343 | 8  | E | NNW-SSE     |
|                     | Serr.- L.Tortonian      |                          | 308 | 79 | 57  | 4  | 148 | 11 | E | NW-SE       |
|                     | Serr.- L.Tortonian      |                          | 175 | 78 | 276 | 2  | 7   | 11 | E | N-S         |
|                     | Serr.- L.Tortonian      |                          | 304 | 87 | 207 | 0  | 117 | 3  | E | WNW-ESE     |
|                     | L.Tort.-<br>L.Messinian |                          | 203 | 79 | 297 | 1  | 27  | 11 | E | NNE-SSW     |
|                     | Serr.- L.Tortonian      |                          | 185 | 76 | 281 | 1  | 30  | 14 | E | N-S         |
|                     | Serr.- L.Tortonian      |                          | 355 | 7  | 221 | 80 | 85  | 7  | C | N-S         |
|                     | Serr.- L.Tortonian      |                          | 51  | 86 | 242 | 2  | 355 | 4  | E | NW-SE       |
|                     | Serr.- L.Tortonian      |                          | 12  | 87 | 277 | 2  | 188 | 1  | E | N-S         |
|                     | Serr.- L.Tortonian      |                          | 322 | 87 | 235 | 1  | 149 | 3  | E | NW-SE       |
|                     | Serr.- L.Tortonian      |                          | 353 | 9  | 228 | 44 | 878 | 39 | C | N-S         |
|                     | Serr.- L.Tortonian      |                          | 281 | 87 | 97  | 12 | 194 | 2  | E | N-S         |
|                     | Serr.- L.Tortonian      |                          | 66  | 86 | 246 | 3  | 336 | 1  | E | NNW-SSE     |
|                     | Serr.- L.Tortonian      |                          | 281 | 87 | 104 | 12 | 13  | 7  | E | N-S         |
|                     | Serr.- L.Tortonian      |                          | 171 | 4  | 242 | 27 | 69  | 64 | C | N-S         |
|                     | Serr.- L.Tortonian      |                          | 129 | 80 | 235 | 7  | 316 | 4  | E | NW-SE       |
|                     | Serr.- L.Tortonian      |                          | 128 | 86 | 304 | 3  | 29  | 2  | E | NNE-SSW     |
|                     | Serr.- L.Tortonian      |                          | 297 | 78 | 124 | 17 | 207 | 9  | E | NNE-SSW     |
|                     | Lower Tortonian         |                          | 117 | 85 | 298 | 7  | 32  | 5  | E | NNE-SSW     |
|                     | Lower Tortonian         |                          | 117 | 85 | 298 | 7  | 32  | 5  | E | NNE-SSW     |
|                     | Serr.- L.Tortonian      |                          | 91  | 89 | 284 | 2  | 192 | 1  | E | NNE-SSW     |
| Huercal-Overa basin | Serr.- L.Tortonian      | Pedrera et al.<br>(2010) | 183 | 86 | 336 | 4  | 66  | 27 | E | NE-SW/NW-SE |
|                     | Serr.- L.Tortonian      |                          | 273 | 80 | 104 | 10 | 14  | 27 | E | NNE-SSW     |
|                     | Serr.- L.Tortonian      |                          | 163 | 82 | 28  | 6  | 297 | 6  | E | NNE-SSW     |

|                 |                    |                          |     |    |     |    |     |       |     |                 |
|-----------------|--------------------|--------------------------|-----|----|-----|----|-----|-------|-----|-----------------|
|                 | Upper Tortonian    |                          | 23  | 70 | 289 | 1  | 198 | 20    | E   | NNW-SSE         |
|                 | Upper Tortonian    |                          | 207 | 86 | 360 | 4  | 90  | 2     | E   | E-W             |
|                 | Upper Tortonian    |                          | 205 | 76 | 360 | 13 | 91  | 6     | E   | E-W             |
|                 | Upper Tortonian    |                          | 174 | 86 | 354 | 47 | 84  | 0     | E   | ENE-WSW         |
|                 | Upper Tortonian    |                          | 84  | 14 | 327 | 61 | 181 | 25    | E   | ENE-WSW         |
|                 | Upper Tortonian    |                          | 313 | 8  | 52  | 48 | 216 | 41    | C   | NNW-SSE         |
|                 | Upper Tortonian    |                          | 184 | 20 | 78  | 38 | 296 | 45    | C   | NNW-SSE         |
|                 | Serr.- L.Tortonian |                          | 82  | 23 | 119 | 6  | 28  | 6     | E   | NE-SW           |
|                 | Serr.- L.Tortonian |                          | 324 | 12 | 179 | 76 | 56  | 8     | E   | NW-SE/ENE-WSW   |
|                 | Serr.- L.Tortonian |                          | 94  | 81 | 210 | 4  | 301 | 8     | E   | NW-SE/ENE-WSW   |
|                 | Serr.- L.Tortonian |                          | 14  | 56 | 272 | 8  | 177 | 33    | E   | NW-SE           |
|                 | Serr.- L.Tortonian |                          | 232 | 65 | 66  | 24 | 334 | 5     | E   | NW-SE           |
|                 | Serr.- L.Tortonian |                          | 42  | 68 | 136 | 1  | 227 | 22    | E   | NE-SW           |
|                 | Serr.- L.Tortonian |                          | 202 | 57 | 101 | 7  | 7   | 32    | E   | NNE-SSW         |
|                 | Lower Tortonian    |                          | 45  | 80 | 221 | 10 | 311 | 1     | E   | NE-SW           |
|                 | Upper Tortonian    |                          | 200 | 42 | 20  | 48 | 110 | 0     | E   | NW-SE           |
|                 | Serr.- L.Tortonian |                          | 25  | 62 | 116 | 1  | 207 | 28    | E   | NNE-SSW         |
|                 | Permo-Trias        |                          | 167 | 77 | 14  | 12 | 283 | 6     | E   | NNE-SSW/ESE-WSW |
|                 | Serr.- L.Tortonian |                          | 137 | 35 | 0   | 46 | 244 | 23    | C   | NW-SE           |
|                 | Serr.- L.Tortonian |                          | 136 | 2  | 137 | 80 | 46  | 10    | C   | NW-SE           |
|                 | Serr.- L.Tortonian |                          | 289 | 78 | 141 | 10 | 50  | 6     | E   | NE-SW           |
|                 | Serr.- L.Tortonian |                          | 233 | 81 | 80  | 8  | 349 | 4     | E   | NE-SW           |
|                 | Serr.- L.Tortonian |                          | 337 | 70 | 163 | 20 | 72  | 2     | E   | NNW-SSE/ENE-WSW |
| Almonzora basin | Upper Tortonian    | Pedrera et al.<br>(2007) | 122 | 84 | 302 | 6  | 32  | 0     | E/C | NE-SW / NW-SE   |
|                 | Upper Tortonian    |                          | 285 | 35 | 48  | 38 | 168 | 33    | E/C | NE-SW / NW-SE   |
|                 | Upper Tortonian    |                          | 302 | 3  | 51  | 82 | 211 | 8     | C   | NW-SE           |
|                 | Upper Tortonian    |                          | 312 | 72 | 119 | 18 | 210 | 4     | E   | NE-SW           |
|                 | Upper Tortonian    |                          | 116 | 16 | 296 | 74 | 26  | 0     | C   | ESE-WNW         |
|                 | Upper Tortonian    |                          | 6   | 14 | 239 | 67 | 101 | 17    | C   | ESE-WNW         |
|                 | Serr.- L.Tortonian |                          | 45  | 88 | 175 | 1  | 265 | 2     | C   | E-W             |
|                 | Upper Tortonian    |                          | 274 | 6  | 6   | 22 | 171 | 67    | C   | NW-SE           |
|                 | Upper Tortonian    |                          | 150 | 2  | 60  | 6  | 258 | 84    | C   | NW-SE           |
|                 | Upper Tortonian    |                          | 348 | 84 | 150 | 6  | 240 | 2     | E   | NE-SW           |
|                 | Serr.- L.Tortonian |                          | 215 | 30 | 334 | 40 | 100 | 35    | E   | ESE-WNW         |
| Upper Tortonian | 306                | 4                        | 41  | 48 | 213 | 42 | C   | NW-SE |     |                 |

|                       |                    |                 |     |    |     |    |     |    |     |               |
|-----------------------|--------------------|-----------------|-----|----|-----|----|-----|----|-----|---------------|
|                       | Serr.- L.Tortonian |                 | 224 | 43 | 122 | 13 | 19  | 44 | E   | NNE-SSW       |
|                       | Upper Tortonian    |                 | 159 | 0  | 68  | 80 | 250 | 10 | E/C | NE-SW / NW-SE |
|                       | Upper Tortonian    |                 | 202 | 48 | 109 | 3  | 16  | 42 | E/C | NE-SW / NW-SE |
|                       | Upper Tortonian    |                 | 199 | 69 | 2   | 20 | 94  | 6  | E   | ESE-WNW       |
|                       | Serr.- L.Tortonian |                 | 176 | 30 | 356 | 60 | 86  | 0  | E/C | E-W / NW-SE   |
|                       | Serr.- L.Tortonian |                 | 160 | 13 | 278 | 64 | 64  | 22 | E/C | E-W / NW-SE   |
|                       |                    |                 | 262 | 89 | 142 | 0  | 52  | 1  |     |               |
| Sorbas basin          | Upper Tortonian    | Do Couto et al. | 7   | 4  | 250 | 81 | 97  | 8  | E/C | E-W / N-S     |
|                       | U. Serr.- U.Tort.  | (2014)          | 47  | 86 | 149 | 1  | 239 | 4  | E   | NE-SW         |
| Tabernas basin        | U. Serr.- U.Tort.  |                 | 182 | 4  | 301 | 81 | 92  | 8  | C   | N-S           |
| Arroyo del Verdelecho | Tortonian          | Fig. 11e        | 122 | 49 | 358 | 27 | 252 | 29 | E   | NE-SW         |
| Arroyo del Verdelecho | Tortonian          | Fig. 11e        | 164 | 70 | 315 | 18 | 48  | 9  | E   | NE-SW         |
| Arroyo del Verdelecho | Tortonian          | Fig. 11c        | 5   | 14 | 226 | 72 | 98  | 11 | E   | E-W           |
| Arroyo del Verdelecho | Trias              | Fig. S2         | 116 | 53 | 242 | 23 | 344 | 27 | E   | N-S           |
| Rambla de Tabernas    | Early Tortonian    | Fig. 12         | 217 | 77 | 319 | 3  | 50  | 13 | E   | E-W           |
| Rambla de Tabernas    | Tortonian          | Fig. 12         | 162 | 72 | 302 | 14 | 34  | 11 | E   | NE-SW         |

**Table S1:** Synthesis of principal stresses orientations determined from inversion of fault slip data in the Almanzora basin, Huercál-Overa basin and Tabernas and Sorbas basins. Orientation of extension and compression axes are indicated.
